# Supplementary material
Source: MDPI journal article supplement (https://www.mdpi.com/2073-4344/7/2/37)
Supplement: s1 [file s1]

# Supplementary Materials: Stereoselective Chemoenzymatic Synthesis of Optically Active Aryl-Substituted Oxygen-Containing Heterocycles

Paola Vitale, Antonia Digeo, Filippo Maria Perna, Gennaro Agrimi, Antonio Salomone, Antonio Scilimati, Cosimo Cardellicchio and Vito Capriati

**Table S1.** Screening of biocatalysts for the stereoselective reduction of 3-chloro-1-aryl-propanones <sup>a</sup>.

| <div style="text-align: center;"> 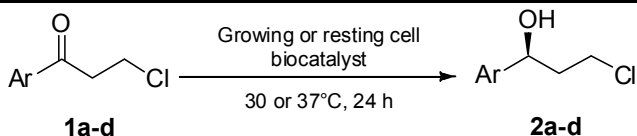 </div> |                                                   |                                                  |                                  |              |                 |                         |
|-----------------------------------------------------------------------------------------------------------------------------|---------------------------------------------------|--------------------------------------------------|----------------------------------|--------------|-----------------|-------------------------|
| Entry                                                                                                                       | Biocatalyst                                       | Ar (1a–d)                                        | Product 2 (Yield %) <sup>b</sup> | Conversion % | er <sup>c</sup> | Abs. Conf. <sup>d</sup> |
| 1                                                                                                                           | <i>Baker's yeast</i> (RC)                         | C <sub>6</sub> H <sub>5</sub> ( <b>1a</b> )      | <b>2a</b> (44)                   | 50           | 94:6            | S                       |
| 2                                                                                                                           | <i>Saccharomyces cerevisiae</i> (GC) <sup>e</sup> | C <sub>6</sub> H <sub>5</sub> ( <b>1a</b> )      | <b>2a</b> (48)                   | 55           | 75:25           | S                       |
| 3                                                                                                                           | <i>Kluyveromyces marxianus</i> (GC) <sup>f</sup>  | C <sub>6</sub> H <sub>5</sub> ( <b>1a</b> )      | <b>2a</b> (31) <sup>g</sup>      | 70           | 58:42           | S                       |
| 4                                                                                                                           | <i>Lactobacillus reuteri</i> (RC) <sup>h,i</sup>  | C <sub>6</sub> H <sub>5</sub> ( <b>1a</b> )      | <b>2a</b> (–) <sup>i</sup>       | 40           | ND <sup>k</sup> | ND <sup>k</sup>         |
| 5                                                                                                                           | <i>Baker's yeast</i> (RC)                         | 4-FC <sub>6</sub> H <sub>4</sub> ( <b>1b</b> )   | <b>2b</b> (13)                   | 15           | 63:37           | S                       |
| 6                                                                                                                           | <i>Lactobacillus reuteri</i> (RC) <sup>h,i</sup>  | 4-FC <sub>6</sub> H <sub>4</sub> ( <b>1b</b> )   | <b>2b</b> (–) <sup>i</sup>       | 28           | ND <sup>k</sup> | ND <sup>k</sup>         |
| 7                                                                                                                           | <i>Baker's yeast</i> (RC)                         | 4-BrC <sub>6</sub> H <sub>4</sub> ( <b>1c</b> )  | <b>2c</b> (5) <sup>m</sup>       | 85           | 95:5            | S                       |
| 8                                                                                                                           | <i>Lactobacillus reuteri</i> (RC) <sup>h,i</sup>  | 4-BrC <sub>6</sub> H <sub>4</sub> ( <b>1c</b> )  | <b>2c</b> (–) <sup>n</sup>       | 12           | ND <sup>k</sup> | ND <sup>k</sup>         |
| 9                                                                                                                           | <i>Baker's yeast</i> (RC)                         | 4-MeOC <sub>6</sub> H <sub>4</sub> ( <b>1d</b> ) | <b>2d</b> (–) <sup>o</sup>       | 12           | ND <sup>k</sup> | ND <sup>k</sup>         |

<sup>a</sup> Typical reaction conditions: orbital incubator (200 rpm); temperature: 30 °C; (GC): inoculum after 24 h growth in a sterile medium containing glucose (1%), peptone (0.5%), yeast extract (0.3%), and malt extract (0.3%) in sterile water; (RC): 0.1 g/L of cell wet mass in 0.1 M KH<sub>2</sub>PO<sub>4</sub> buffer (pH = 7.4) enriched with 1% glucose, halo-ketone (2 mM final concentration); <sup>b</sup> Isolated yield after column chromatography; <sup>c</sup> Enantiomeric ratio (er) determined by HPLC analysis; <sup>d</sup> Absolute configuration (abs. conf.) of halohydrins (**2a–d**) determined by comparing optical rotation sign and retention time (HPLC analysis) with known data; <sup>e</sup> CBS 7536; <sup>f</sup> CBS 6556; <sup>g</sup> Propiophenone (35%) and 1-phenylpropan-1-ol (33%) have been detected by <sup>1</sup>H NMR analysis of the reaction crude; <sup>h</sup> DSM 20016; <sup>i</sup> Typical reaction conditions: cells were suspended in PBS at pH 7.4 supplemented with 1% glucose; then, ketone was added at the final concentration of 1 g/L (50 mL total volume), anaerobiosis; temperature: 37 °C; orbital incubator: 200 rpm; <sup>j</sup> 1-Phenylprop-2-en-1-one (24%), 1-phenylprop-2-en-1-ol (5%), propiophenone (3%) and 3-hydroxypropiophenone (7%) have been detected by <sup>1</sup>H NMR analysis of the reaction crude; <sup>k</sup> ND means not determined because of the trace content; <sup>l</sup> 1-(4-Fluorophenyl)prop-2-en-1-one (17%), 1-(4-fluorophenyl)prop-2-en-1-ol (5%), 1-(4-fluorophenyl)propanone (1%), and 3-hydroxy-1-(4-fluorophenyl)propanone (4%) have been detected by <sup>1</sup>H NMR analysis of the reaction crude; <sup>m</sup> Propiophenone (75%) was isolated as the main product, together with 4-bromophenyloxetane (9%, er = 96:4%); <sup>n</sup> 1-(4-Bromophenyl)prop-2-en-1-one (5%), 1-(4-bromophenyl)prop-2-en-1-ol (5%), and 3-hydroxy-1-(4-bromophenyl)propanone (1%) have been detected by <sup>1</sup>H NMR analysis of the reaction crude; <sup>o</sup> Propiophenone (5%) has also been detected together with the starting material (88%) in the reaction crude.

**Table S2.** Screening of biocatalysts for the stereoselective reduction of 4-chloro-1-aryl-1-butanones <sup>a</sup>.

| <div style="text-align: center;"> 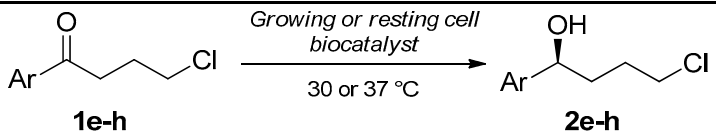 <p><b>1e-h</b> <span style="margin-left: 150px;"></span> <b>2e-h</b></p> </div> |                                                   |                                                                |                                  |                |                 |                           |
|------------------------------------------------------------------------------------------------------------------------------------------------------------------------------------------------------|---------------------------------------------------|----------------------------------------------------------------|----------------------------------|----------------|-----------------|---------------------------|
| Entry                                                                                                                                                                                                | Biocatalyst                                       | Ar (1e–h)                                                      | Product 2 (yield %) <sup>b</sup> | Conversion (%) | er <sup>c</sup> | Abs. Config. <sup>d</sup> |
| 1                                                                                                                                                                                                    | <i>Baker's yeast</i> (RC)                         | C <sub>6</sub> H <sub>5</sub> ( <b>1e</b> )                    | <b>2e</b> (44)                   | 49             | 95:5            | S                         |
| 2                                                                                                                                                                                                    | <i>Saccharomyces cerevisiae</i> (GC) <sup>e</sup> | C <sub>6</sub> H <sub>5</sub> ( <b>1e</b> )                    | <b>2e</b> (65)                   | 70             | 49:51           | S                         |
| 3                                                                                                                                                                                                    | <i>Kluyveromyces marxianus</i> (GC) <sup>f</sup>  | C <sub>6</sub> H <sub>5</sub> ( <b>1e</b> )                    | <b>2e</b> (4)                    | 7              | 42:58           | S                         |
| 4                                                                                                                                                                                                    | <i>Lactobacillus reuteri</i> (RC) <sup>g,h</sup>  | C <sub>6</sub> H <sub>5</sub> ( <b>1e</b> )                    | <b>2e</b> (–) <sup>i</sup>       | 15             | ND <sup>j</sup> | ND <sup>j</sup>           |
| 5                                                                                                                                                                                                    | <i>Baker's yeast</i> (RC)                         | 4-FC <sub>6</sub> H <sub>4</sub> ( <b>1f</b> )                 | <b>2f</b> (–) <sup>k</sup>       | 40             | ND <sup>j</sup> | ND <sup>j</sup>           |
| 6                                                                                                                                                                                                    | <i>Lactobacillus reuteri</i> (RC) <sup>g,h</sup>  | 4-FC <sub>6</sub> H <sub>4</sub> ( <b>1f</b> )                 | <b>2f</b> (–) <sup>l</sup>       | 14             | ND <sup>j</sup> | ND <sup>j</sup>           |
| 7                                                                                                                                                                                                    | <i>Baker's yeast</i> (RC)                         | 4-BrC <sub>6</sub> H <sub>4</sub> ( <b>1g</b> )                | <b>2g</b> (–) <sup>m</sup>       | – <sup>m</sup> | ND <sup>j</sup> | ND <sup>j</sup>           |
| 8                                                                                                                                                                                                    | <i>Baker's yeast</i> (RC)                         | 4-CH <sub>3</sub> OC <sub>6</sub> H <sub>4</sub> ( <b>1h</b> ) | <b>2h</b> (–) <sup>n</sup>       | 5              | ND <sup>j</sup> | ND <sup>j</sup>           |
| 9                                                                                                                                                                                                    | <i>Lactobacillus reuteri</i> (RC) <sup>g,h</sup>  | 4-CH <sub>3</sub> OC <sub>6</sub> H <sub>4</sub> ( <b>1h</b> ) | <b>2h</b> (–) <sup>o</sup>       | 42             | ND <sup>j</sup> | ND <sup>j</sup>           |

<sup>a</sup> Typical reaction conditions: orbital incubator at 200 rpm; temperature: 30 °C; (GC): inoculum after 24 h cell growth in a sterile medium containing glucose (1%), peptone (0.5%), yeast extract (0.3%), and malt extract (0.3%) in sterile water; (RC): 0.1 g/L of cell wet mass in 0.1 M KH<sub>2</sub>PO<sub>4</sub> buffer (pH = 7.4) enriched with 1% glucose, haloketone (2 mM final concentration); <sup>b</sup> Isolated yield after column chromatography; <sup>c</sup> Enantiomeric ratio (er) determined by HPLC analysis; <sup>d</sup> Absolute configuration (abs. conf.) of halohydrins (**2e–h**) determined both by comparing optical rotation sign and retention time (HPLC analysis) with known data; <sup>e</sup> CBS 7336; <sup>f</sup> CBS 6556; <sup>g</sup> DSM 20016; <sup>h</sup> Typical reaction conditions: cells were suspended in PBS at pH 7.4 supplemented with 1% glucose; then, ketone was added at the final concentration of 1 g/L (50 mL total volume), anaerobiosis; temperature: 37 °C; orbital incubator: 200 rpm; <sup>i</sup> 4-Hydroxy-1-phenylbutan-1-one (13%) has been detected by <sup>1</sup>H NMR analysis of the reaction crude; <sup>j</sup> ND means not determined because of the trace content; <sup>k</sup> The corresponding butyrophenone (37%) has been detected by <sup>1</sup>H NMR analysis of the reaction crude; <sup>l</sup> 4-Hydroxy-1-(4-fluorophenyl)butan-1-one (13%) has been detected by GC-MS and <sup>1</sup>H NMR analysis of the reaction crude; <sup>m</sup> No reaction. <sup>n</sup> Chlorohydrin **2h** (5%) has been detected by GC-MS analysis of the reaction crude; <sup>o</sup> 4-Hydroxy-1-(4-methoxyphenyl)butan-1-one (32%) and 4-(4-methoxyphenyl)butan-2-one (9%) have been detected by <sup>1</sup>H NMR analysis of the reaction crude.
